# Supplementary material for: Neuronal precision and the limits for acoustic signal recognition in a small neuronal network
Source: PubMed Central journal article supplement — J Comp Physiol A Neuroethol Sens Neural Behav Physiol. 2010 Nov 10;197(3):251–65. doi: 10.1007/s00359-010-0606-5 (PMC3040818; doi:10.1007/s00359-010-0606-5), 2010-11-10
Supplement: 359_2010_606_MOESM1_ESM.pdf [file 359_2010_606_MOESM1_ESM.pdf]

Online Resource 1. Number of specimens for each cell type recorded.

| Cell type                            | <i>C.b.</i> | <i>L.m.</i>      | Sum       |
|--------------------------------------|-------------|------------------|-----------|
| Receptor cells                       | 2           | 11               | 13        |
| TN1                                  | 12          | 13               | 25        |
| BSN1                                 | 2           | 8                | 10        |
| SN1                                  |             | 5                | 5         |
| SN3                                  | 1           | 0                | 1         |
| TN4                                  | 1           | 0                | 1         |
| AN1                                  | 3           | 6                | 9         |
| AN2                                  | 3           | 6                | 9         |
| AN3                                  | 4           | 4                | 8         |
| AN4                                  | 1           | 0                | 1         |
| AN6                                  | 1           | 0                | 1         |
| AN7                                  | 0           | 1                | 1         |
| AN 12                                | 2           | 0                | 2         |
| AN( <i>not uniquely identified</i> ) | 2           | 1                | 3         |
|                                      |             | <b>Total of:</b> | <b>89</b> |

**article title:** Neuronal Precision and the Limits for Acoustic Signal Recognition in a Small Neuronal Network

**journal name:** J Comp Physiol A

**author names:** Daniela Neuhofer, Martin Stemmler, Bernhard Ronacher

**affiliation and e-mail address of the corresponding author:**

Department of Biology

Humboldt-Universität zu Berlin

Invalidenstrasse 43

10115 Berlin

Germany

neuhofda@cms.hu-berlin.de
