# Supplementary material for: Neuronal precision and the limits for acoustic signal recognition in a small neuronal network
Source: PubMed Central journal article supplement — J Comp Physiol A Neuroethol Sens Neural Behav Physiol. 2010 Nov 10;197(3):251–65. doi: 10.1007/s00359-010-0606-5 (PMC3040818; doi:10.1007/s00359-010-0606-5), 2010-11-10
Supplement: 359_2010_606_MOESM2_ESM.pdf [file 359_2010_606_MOESM2_ESM.pdf]

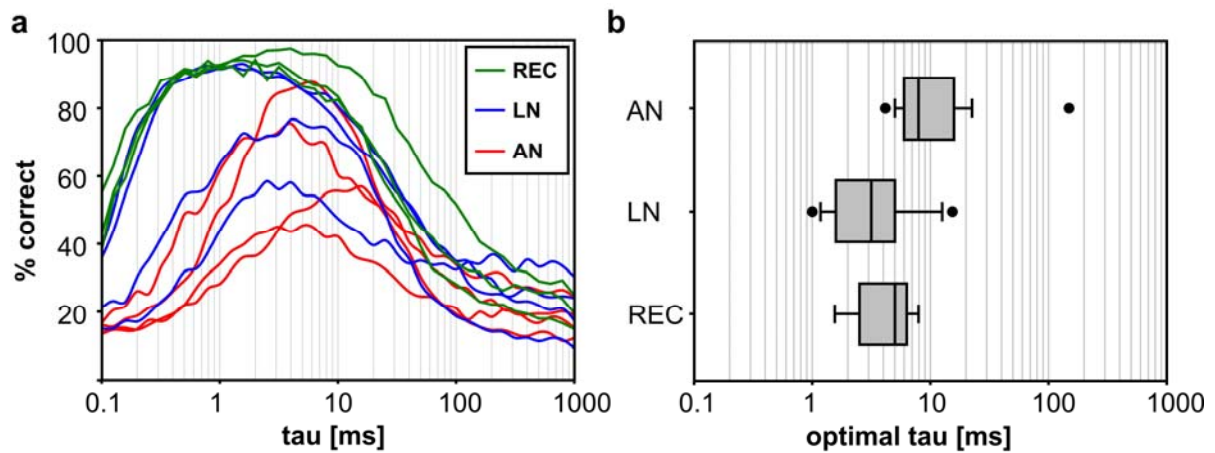

**Online Resource 2** a) Discrimination performance as a function of the temporal resolution parameter  $\tau$  for a sample of neurons from the three processing stages in the metathoracic ganglion. b) The values of optimal  $\tau$  for ascending (AN, Median = 8 ms), local (LN, Median = 3ms) and receptor cells (REC, Median = 5ms). There was a significant difference across computation levels ( $P < 0.0001$ ; Kruskal-Wallis-test). REC-LN:  $p = 0.167$ ; REC-AN:  $p = 0.0004$ ; LN-AN:  $p < 0.0001$ ; Mann-Whitney-U-test).

**article title:** Neuronal Precision and the Limits for Acoustic Signal Recognition in a Small Neuronal Network

**journal name:** J Comp Physiol A

**author names:** Daniela Neuhofer, Martin Stemmler, Bernhard Ronacher

**affiliation and e-mail address of the corresponding author:**

Department of Biology

Humboldt-Universität zu Berlin

Invalidenstrasse 43

10115 Berlin

Germany

neuhofda@cms.hu-berlin.de
