# Supplementary material for: Neuronal precision and the limits for acoustic signal recognition in a small neuronal network
Source: PubMed Central journal article supplement — J Comp Physiol A Neuroethol Sens Neural Behav Physiol. 2010 Nov 10;197(3):251–65. doi: 10.1007/s00359-010-0606-5 (PMC3040818; doi:10.1007/s00359-010-0606-5), 2010-11-10
Supplement: 359_2010_606_MOESM3_ESM.pdf [file 359_2010_606_MOESM3_ESM.pdf]

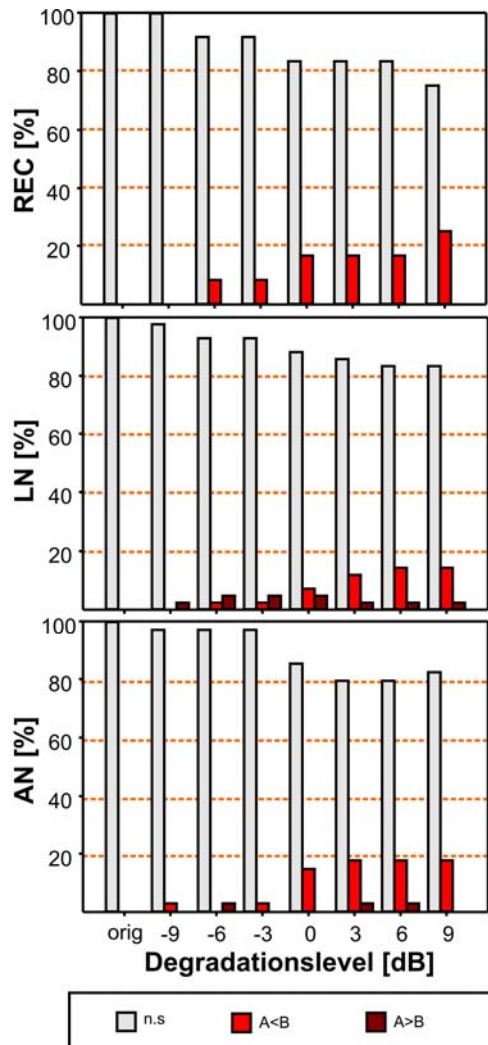

**Online Resource 3 Does intrinsic noise depend on external signal degradation?** Testing for significant differences between ‘intrinsic’ distance distributions. The abscissa shows the different degradation levels, the ordinate shows the number of cells in percent. Grey bars indicate cells which exhibited no significant differences; light red bars indicate cells which showed significantly lower intrinsic distances for spike trains in response to the original song compared to the degraded signals. Bars in dark red show cells which exhibited significantly higher intrinsic distances for the original song. The three different processing stages are shown in separate graphs: Receptor cells (upper graph), local neurons (middle graph), ascending neurons (lower graph).

**article title:** Neuronal Precision and the Limits for Acoustic Signal Recognition in a Small Neuronal Network

**journal name:** J Comp Physiol A

**author names:** Daniela Neuhofer, Martin Stemmler, Bernhard Ronacher

**affiliation and e-mail address of the corresponding author:**

Department of Biology

Humboldt-Universität zu Berlin

Invalidenstrasse 43

10115 Berlin

Germany

neuhofda@cms.hu-berlin.de
