# Supplementary material for: Neuronal precision and the limits for acoustic signal recognition in a small neuronal network
Source: PubMed Central journal article supplement — J Comp Physiol A Neuroethol Sens Neural Behav Physiol. 2010 Nov 10;197(3):251–65. doi: 10.1007/s00359-010-0606-5 (PMC3040818; doi:10.1007/s00359-010-0606-5), 2010-11-10
Supplement: 359_2010_606_MOESM4_ESM.pdf [file 359_2010_606_MOESM4_ESM.pdf]

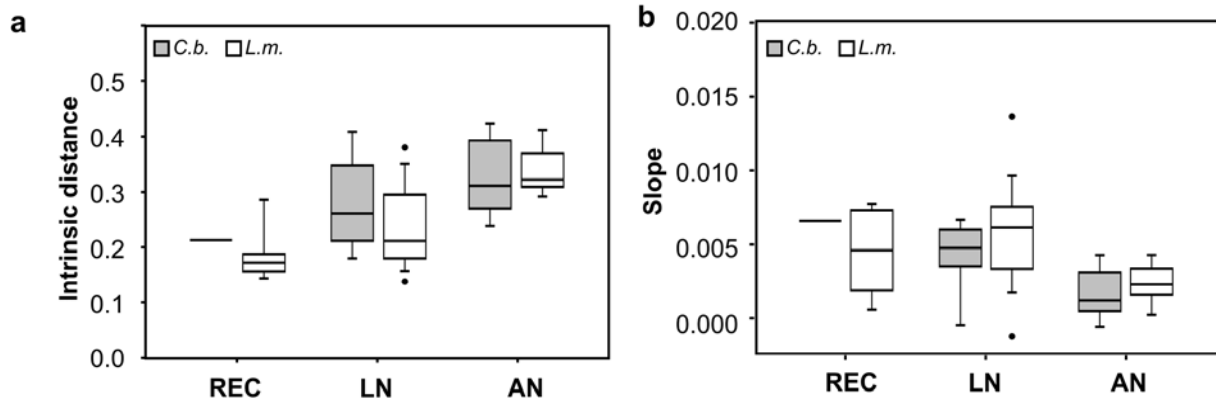

**Online Resource 4** a) Comparison of intrinsic distances (ordinate) between *Chorthippus biguttulus* (grey boxplots) and *Locusta migratoria* (white boxplots) for increasing levels of processing (abscissa). There were no significant differences between the two species investigated (REZ:  $p = 0.231$ ; LN:  $p = 0.119$ , AN:  $p = 0.695$ , Mann-Whitney-U-Test). b) Comparison of the slopes (ordinate) between *Chorthippus biguttulus* and *Locusta migratoria* for increasing levels of processing (abscissa). Again, there were no significant differences between the two species (REZ:  $p = 0.513$ ; LN:  $p = 0.187$ , AN:  $p = 0.217$ , Mann-Whitney-U-Test).

**article title:** Neuronal Precision and the Limits for Acoustic Signal Recognition in a Small Neuronal Network

**journal name:** J Comp Physiol A

**author names:** Daniela Neuhofer, Martin Stemmler, Bernhard Ronacher

**affiliation and e-mail address of the corresponding author:**

Department of Biology

Humboldt-Universität zu Berlin

Invalidenstrasse 43

10115 Berlin

Germany

neuhofda@cms.hu-berlin.de
