# Supplementary material for: Neuronal precision and the limits for acoustic signal recognition in a small neuronal network
Source: PubMed Central journal article supplement — J Comp Physiol A Neuroethol Sens Neural Behav Physiol. 2010 Nov 10;197(3):251–65. doi: 10.1007/s00359-010-0606-5 (PMC3040818; doi:10.1007/s00359-010-0606-5), 2010-11-10
Supplement: 359_2010_606_MOESM5_ESM.pdf [file 359_2010_606_MOESM5_ESM.pdf]

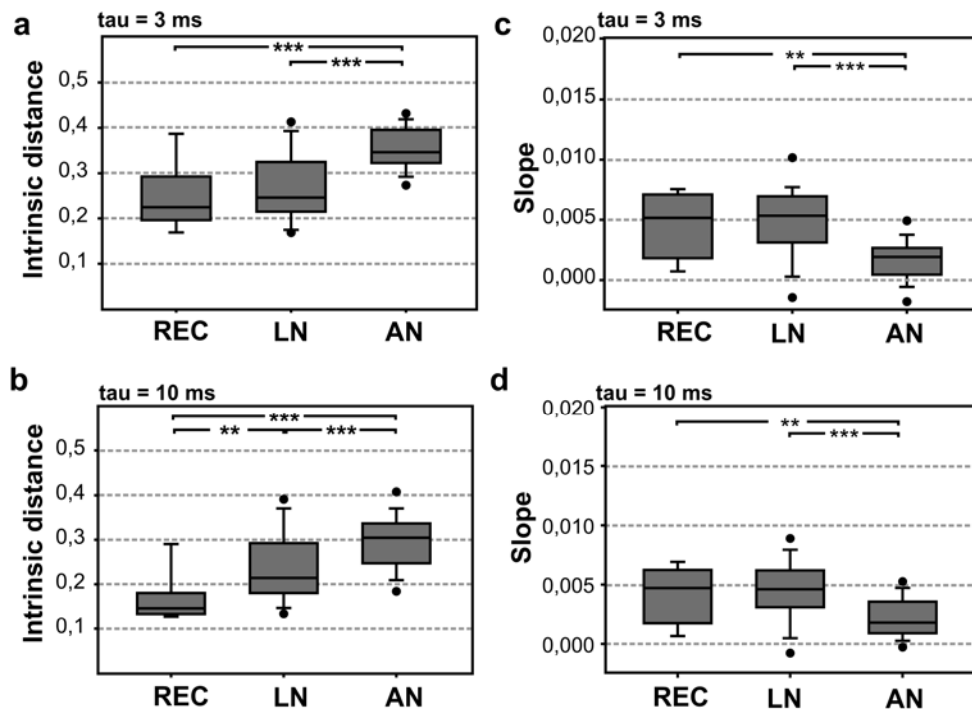

**Online Resource 5** a,b) Comparing the intrinsic distances between receptor cells, local and ascending neurons for a temporal resolution of A) 3 ms ( $P < 0.001$ ; Kruskal-Wallis-test; REC-LN:  $p = 0.235$ ; REC-AN:  $p < 0.001$ ; LN-AN  $p < 0.001$ ; Mann-Whitney-U *post hoc* comparisons). B) 10 ms ( $P < 0.001$ ; Kruskal-Wallis-test; REC-LN:  $p < 0.006$ ; REC-AN:  $p < 0.001$ ; LN-AN  $p = 0.001$ ; Mann-Whitney-U *post hoc* comparisons). c,d) Comparison of the slopes between the three computation levels for a temporal resolution of c) 3ms ( $P < 0.001$ ; Kruskal-Wallis-test; REC-LN:  $p = 0.708$ ; REC-AN:  $p < 0.01$ ; LN-AN  $p < 0.001$ ; Mann-Whitney-U *post hoc* comparisons) d) 10ms ( $P < 0.001$ ; Kruskal-Wallis-test; REC-LN:  $p = 0.620$ ; REC-AN:  $p < 0.01$ ; LN-AN  $p < 0.001$ ; Mann-Whitney-U *post hoc* comparisons);  $N = 13$  (REC), 42 (LN) 34 (AN).

**article title:** Neuronal Precision and the Limits for Acoustic Signal Recognition in a Small Neuronal Network

**journal name:** J Comp Physiol A

**author names:** Daniela Neuhofer, Martin Stemmler, Bernhard Ronacher

**affiliation and e-mail address of the corresponding author:**

Department of Biology

Humboldt-Universität zu Berlin

Invalidenstrasse 43

10115 Berlin

Germany

neuhofda@cms.hu-berlin.de
