# Supplementary material for: Neuronal precision and the limits for acoustic signal recognition in a small neuronal network
Source: PubMed Central journal article supplement — J Comp Physiol A Neuroethol Sens Neural Behav Physiol. 2010 Nov 10;197(3):251–65. doi: 10.1007/s00359-010-0606-5 (PMC3040818; doi:10.1007/s00359-010-0606-5), 2010-11-10
Supplement: 359_2010_606_MOESM6_ESM.pdf [file 359_2010_606_MOESM6_ESM.pdf]

REC

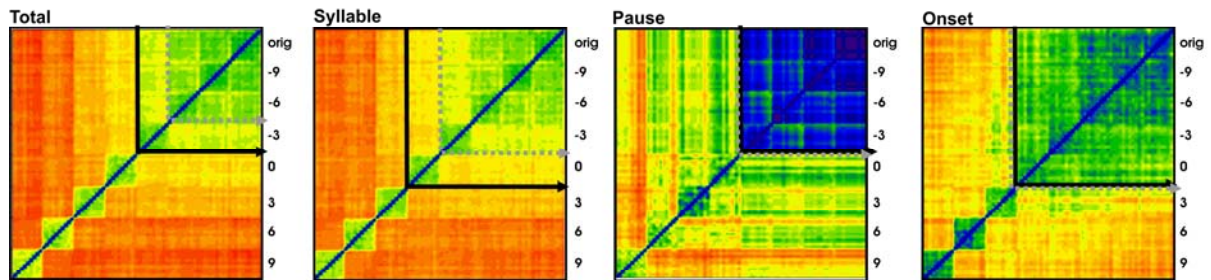

SN1

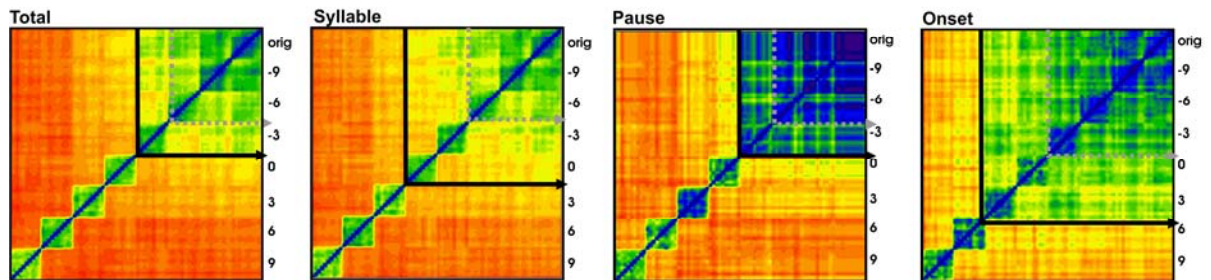

TN1

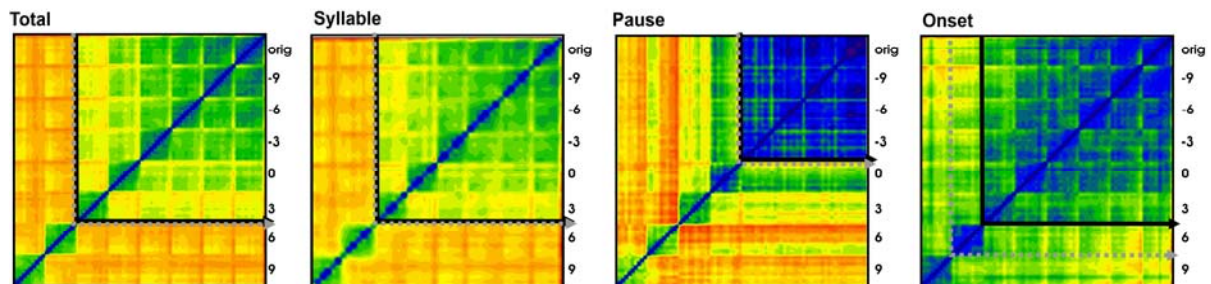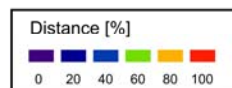

**Online Resource 6** Distance matrices of a receptor cell (upper row) and two local interneurones SN1 and TN1 (middle and lower row). For each cell, the matrices of the total response, the syllable response, the pause response and the Onset response are shown. Distances are color coded from blue to red (zero to maximum distance). The nCDLs for each cell, as determined by the discrimination analysis (grey, dashed line) and the information-based clustering algorithm (black, solid line) (see Fig.5), are indicated.

**article title:** Neuronal Precision and the Limits for Acoustic Signal Recognition in a Small Neuronal Network

**journal name:** J Comp Physiol A

**author names:** Daniela Neuhofer, Martin Stemmler, Bernhard Ronacher

**affiliation and e-mail address of the corresponding author:**

Department of Biology

Humboldt-Universität zu Berlin

Invalidenstrasse 43

10115 Berlin

Germany

neuhofda@cms.hu-berlin.de
