# Supplementary material for: Neuronal precision and the limits for acoustic signal recognition in a small neuronal network
Source: PubMed Central journal article supplement — J Comp Physiol A Neuroethol Sens Neural Behav Physiol. 2010 Nov 10;197(3):251–65. doi: 10.1007/s00359-010-0606-5 (PMC3040818; doi:10.1007/s00359-010-0606-5), 2010-11-10
Supplement: 359_2010_606_MOESM7_ESM.pdf [file 359_2010_606_MOESM7_ESM.pdf]

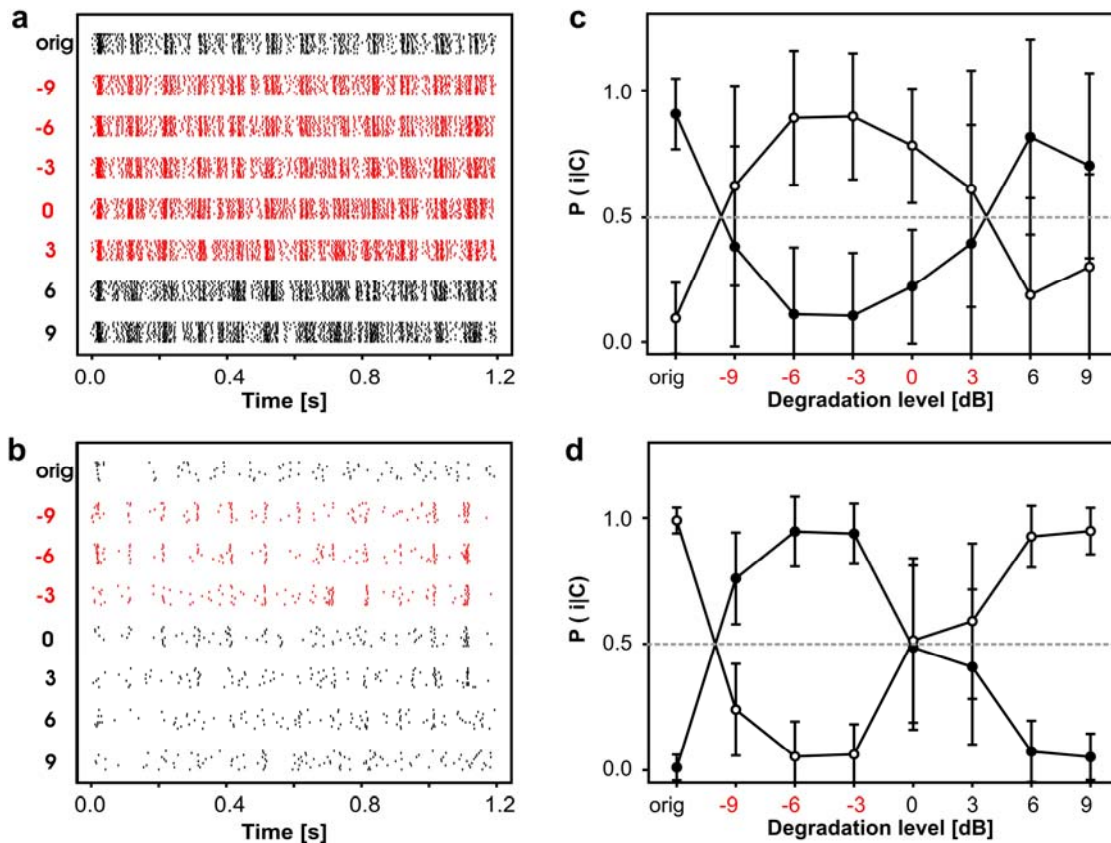

**Online Resource 7** Ambiguous classification boundaries. a) The spike raster plot of AN3, an ascending auditory interneuron. The responses to 10 trials of each degradation level are plotted top-down. Spike trains, which are assigned to the ‘noise’ class according to the results of the information-based algorithm are drawn in red. b) The mean probability of the assignment of responses to class 1 (‘orig’ class, open symbols) or class 2 (‘noise’ class, closed symbols) according to the information-based algorithm. c) The spike raster plot of an ascending neuron not yet described by Römer and Marquart (1984) d) Probability of assignment according to the information-based cluster algorithm.

**article title:** Neuronal Precision and the Limits for Acoustic Signal Recognition in a Small Neuronal Network

**journal name:** J Comp Physiol A

**author names:** Daniela Neuhofer, Martin Stemmler, Bernhard Ronacher

**affiliation and e-mail address of the corresponding author:**

Department of Biology

Humboldt-Universität zu Berlin

Invalidenstrasse 43

10115 Berlin

Germany

neuhofda@cms.hu-berlin.de
